# Supplementary material for: FOLFIRI Plus Durvalumab With or Without Tremelimumab in Second-Line Treatment of Advanced Gastric or Gastroesophageal Junction Adenocarcinoma: The PRODIGE 59-FFCD 1707-DURIGAST Randomized Clinical Trial
Source: PubMed Central journal article supplement (PMC11190792; doi:10.1001/jamaoncol.2024.0207), 2024-04-04

## Supplemental Online Content

Tougeron D, Dahan L, Evesque L, et al. FOLFIRI plus durvalumab with or without tremelimumab in second-line treatment of advanced gastric or gastroesophageal junction adenocarcinoma: the PRODIGE 59-FFCD 1707-DURIGAST Randomized Clinical Trial. *JAMA Oncol*. Published online April 4, 2024. doi:10.1001/jamaoncol.2024.0207

**eTable 1.** Univariate and multivariate analysis of predictive factors of progression-free survival

**eFigure 1.** Progression-free survival according to combined positive score (CPS)

**eFigure 2.** Progression-free survival according to tumor proportion score (TPS)

**eFigure 3.** Time to deterioration (10 points) in global quality of life score

This supplemental material has been provided by the authors to give readers additional information about their work.

**eTable 1. Univariate and multivariate analysis of predictive of factors of progression-free survival**

|                                               |                                     | Events / n (%) | Univariate analysis<br>Hazard ratio [95%CI]<br>p-value | Multivariate analysis Hazard<br>ratio [95%CI]<br>p-value |
|-----------------------------------------------|-------------------------------------|----------------|--------------------------------------------------------|----------------------------------------------------------|
| <b>Arm</b>                                    | Folfiri + durvalumab                | 44/47 (93.6)   | Reference                                              |                                                          |
|                                               | Folfiri + durvalumab + tremelimumab | 41/45 (91.1)   | 0.84 [0.54;1.29]; p=0.429                              |                                                          |
| <b>Age (years)</b>                            | ≥ 60 years                          | 41/45 (91.1)   | Reference                                              |                                                          |
|                                               | < 60 years                          | 44/47 (93.6)   | 1.22 [0.8;1.88]; p=0.356                               |                                                          |
| <b>Sex</b>                                    | Female                              | 26/28 (92.9)   | Reference                                              |                                                          |
|                                               | Male                                | 59/64 (92.2)   | 1.14 [0.72;1.82]; p=0.573                              |                                                          |
| <b>ECOG PS</b>                                | 1                                   | 57/61 (93.4)   | Reference                                              |                                                          |
|                                               | 0                                   | 28/31 (90.3)   | 0.87 [0.55;1.39]; p=0.570                              |                                                          |
| <b>Liver metastases</b>                       | Yes                                 | 36/37 (97.3)   | Reference                                              | Reference                                                |
|                                               | No                                  | 49/55 (89.1)   | 0.47 [0.3;0.74]; p=0.001                               | 0.46 [0.29;0.74]; p=0.001                                |
| <b>Body Mass Index (kg/m<sup>2</sup>)</b>     | > 25 kg/m <sup>2</sup>              | 52/59 (88.1)   | Reference                                              | Reference                                                |
|                                               | ≤ 25 kg/m <sup>2</sup>              | 33/33 (100)    | 1.50 [0.97;2.33]; p=0.071                              | 1.29 [0.82;2.02]; p=0.273                                |
| <b>Time to metastatic disease</b>             | Synchronous                         | 56/60 (93.3)   | Reference                                              |                                                          |
|                                               | Metachronous                        | 29/32 (90.6)   | 0.73 [0.46;1.14]; p=0.168                              |                                                          |
| <b>HER2 status</b>                            | Positive                            | 18/21 (85.7)   | Reference                                              | Reference                                                |
|                                               | Negative                            | 66/70 (94.3)   | 1.54 [0.91;2.61]; p=0.106                              | 1.59 [0.94;2.71]; p=0.086                                |
| <b>Primary tumour site</b>                    | Stomach                             | 40/43 (93.0)   | Reference                                              |                                                          |
|                                               | Gastro-oesophageal junction         | 45/49 (91.8)   | 0.76 [0.49;1.16]; p=0.200                              |                                                          |
| <b>Tumour subtype (Lauren classification)</b> | Diffuse type                        | 35/37 (94.6)   | Reference                                              |                                                          |
|                                               | Intestinal type                     | 44/48 (91.7)   | 0.75 [0.48;1.18]; p=0.216                              |                                                          |
|                                               | Unknown                             | 5/6 (83.3)     | 0.55 [0.22;1.41]; p=0.214                              |                                                          |
| <b>Peritoneal carcinomatosis</b>              | Yes                                 | 31/33 (93.9)   | Reference                                              |                                                          |
|                                               | No                                  | 54/59 (91.5)   | 0.91 [0.59;1.42]; p=0.692                              |                                                          |
| <b>Previous Treatment</b>                     | Doublet                             | 53/56 (94.6)   | Reference                                              |                                                          |
|                                               | Single agent                        | 2/2 (100)      | 1.04 [0.25;4.32]; p=0.954                              |                                                          |
|                                               | Triplet                             | 30/34 (88.2)   | 0.79 [0.5;1.25]; p=0.310                               |                                                          |

ECOG PS: Eastern Cooperative Oncology Group performance status

**eFigure 1. Progression-free survival according to combined positive score (CPS)**

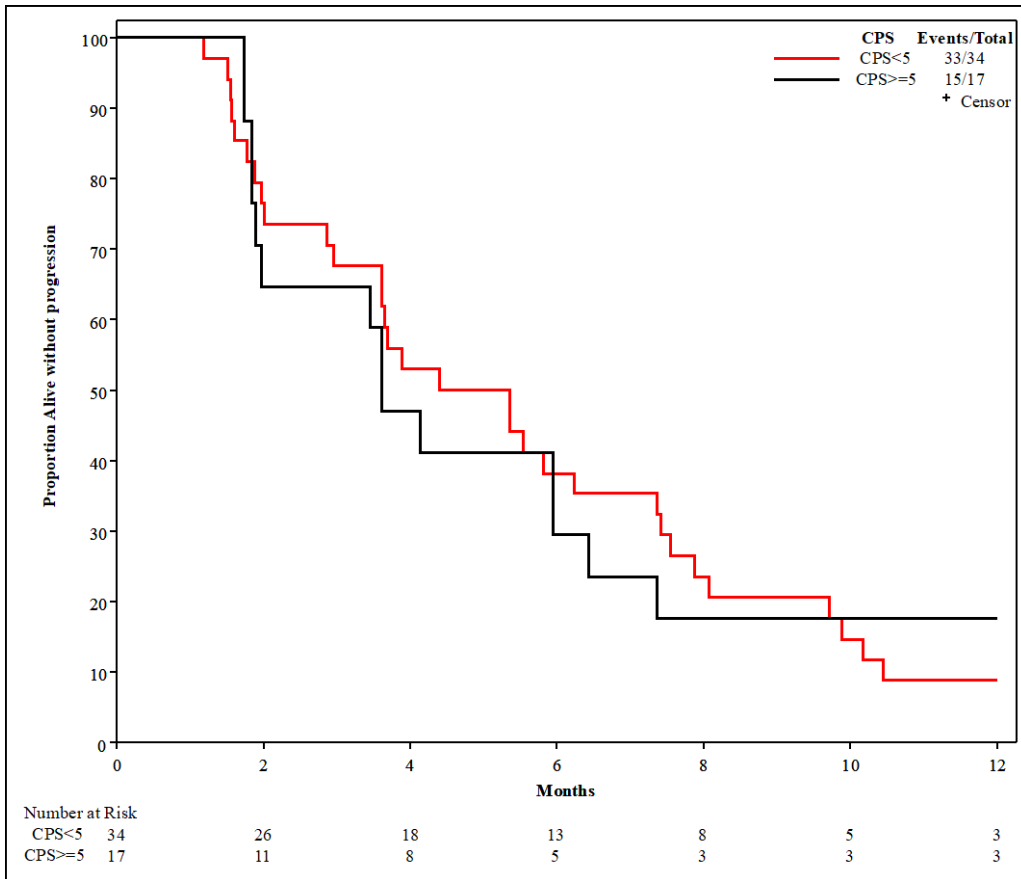

**eFigure 2. Progression-free survival according to tumour proportion score (TPS)**

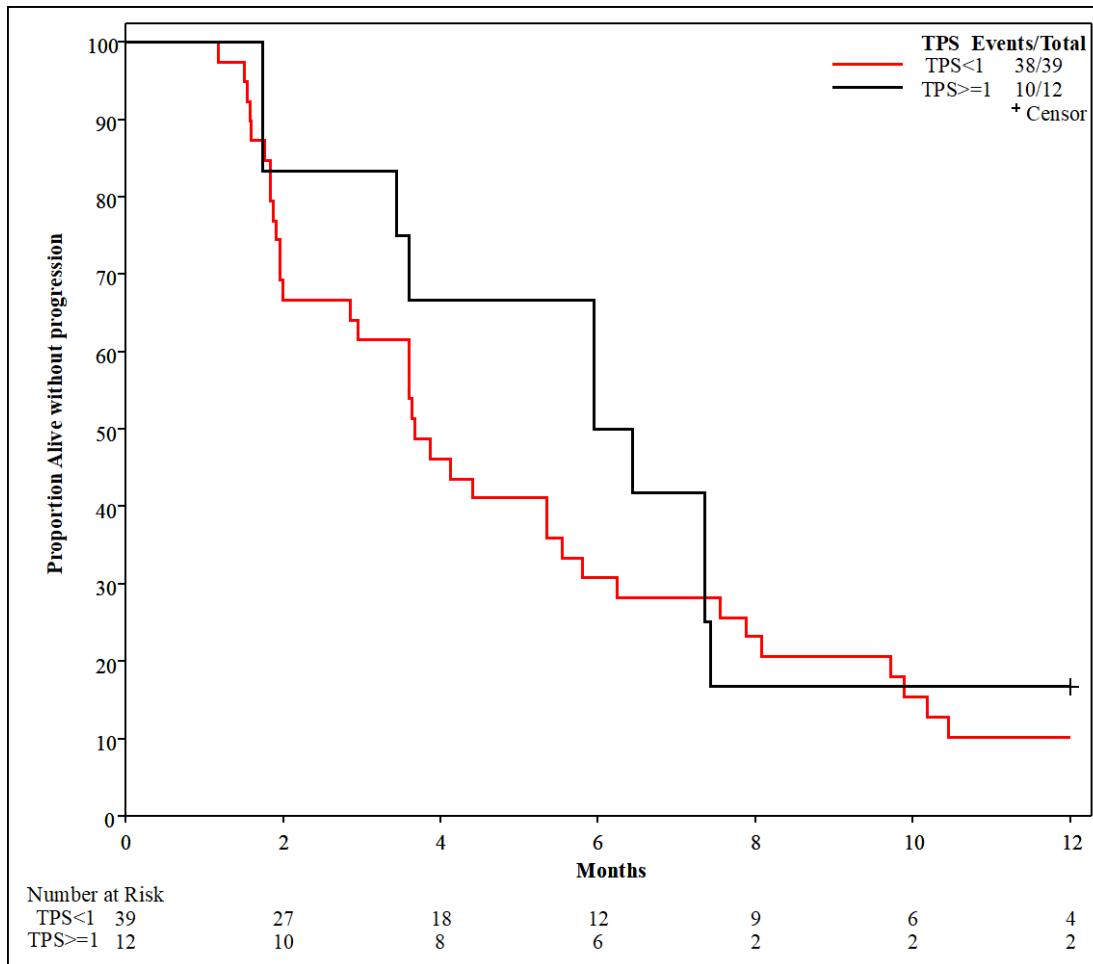

**eFigure 3. Time to deterioration (10 points) in global quality of life score**

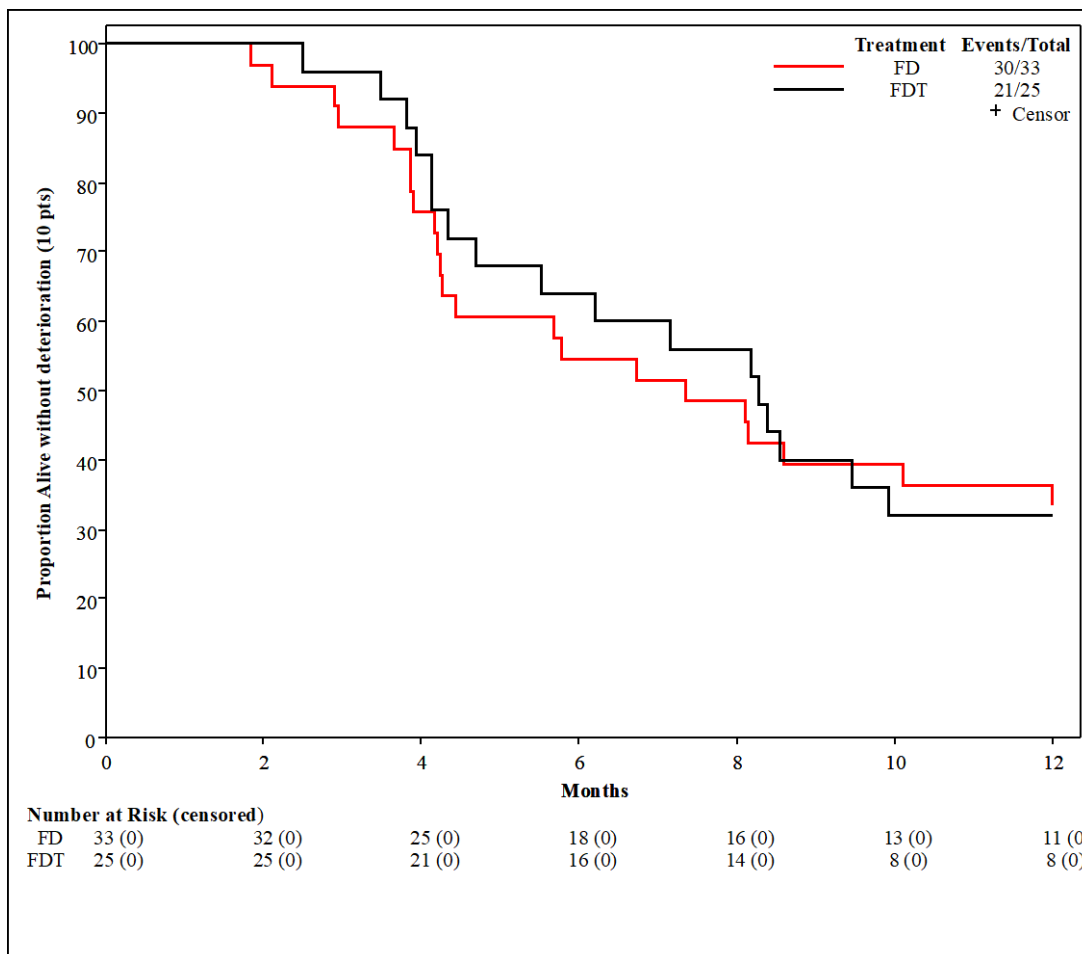

Supplement: jamaoncol-e240207-s004.pdf [file jamaoncol-e240207-s004.pdf]
