# Supplementary material for: FOLFIRI Plus Durvalumab With or Without Tremelimumab in Second-Line Treatment of Advanced Gastric or Gastroesophageal Junction Adenocarcinoma: The PRODIGE 59-FFCD 1707-DURIGAST Randomized Clinical Trial
Source: PubMed Central journal article supplement (PMC11190792; doi:10.1001/jamaoncol.2024.0207), 2024-04-04
Supplement: jamaoncol-e240207-s002.pdf [file jamaoncol-e240207-s002.pdf]

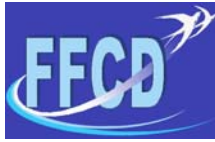

1  
2  
3  
4  
5  
6  
7  
8  
9  
10  
11  
12  
13  
14  
15  
16  
17  
18  
19  
20  
21  
22  
23  
24  
25  
26  
27  
28  
29  
30

---

**A randomized phase II study evaluating FOLFIRI +  
durvalumab vs FOLFIRI + durvalumab and tremelimumab in  
second-line treatment of patients with advanced gastric or  
gastro-oesophageal junction adenocarcinoma**

Phase II randomized, non-comparative study

**DURIGAST – PRODIGE 59 (FFCD 1707)**

---

Statistical Analysis Plan

Final Analysis

Version 3.0 dated 11/03/2022

Writer : Karine Le Malicot

Review Committee : Pr David Tougeron, Leathicia Ndong, Charles Fuchey, Emilie Barbier

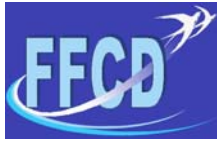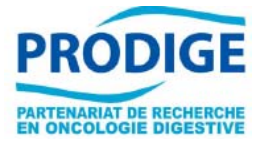

31

32 **Signature page :**

33

34 I approve the statistical analysis plan:

35

| <b>Pr David Tougeron</b> | Date | Signature                                                                           |
|--------------------------|------|-------------------------------------------------------------------------------------|
| Coordonnator             |      |  |
|                          |      |                                                                                     |

36

37

| <b>Karine Le Malicot</b> | Date       | Signature                                                                            |
|--------------------------|------------|--------------------------------------------------------------------------------------|
| FFCD                     | 14/03/2022 |  |
| Biostatistician          |            |                                                                                      |

38

39

| <b>Emilie Barbier</b>    | Date | Signature |
|--------------------------|------|-----------|
| FFCD                     |      |           |
| Independent Statistician |      |           |

40

41

42

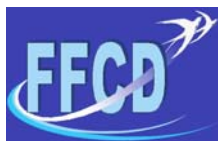

## 43 Table des matières

|    |                                                             |           |
|----|-------------------------------------------------------------|-----------|
| 44 | <b>ABBREVIATIONS</b> .....                                  | <b>5</b>  |
| 45 | <b>1 INTRODUCTION</b> .....                                 | <b>6</b>  |
| 46 | <b>1.1 Study objectives</b> .....                           | <b>6</b>  |
| 47 | 1.1.1 Primary objectives .....                              | 6         |
| 48 | 1.1.2 Secondary objectives .....                            | 6         |
| 49 | 1.1.3 Ancillary analyses.....                               | 6         |
| 50 | <b>2 EXPERIMENTAL PLAN</b> .....                            | <b>6</b>  |
| 51 | <b>2.1 Study design</b> .....                               | <b>6</b>  |
| 52 | <b>2.2 Treatment arms</b> .....                             | <b>7</b>  |
| 53 | <b>2.3 Randomization</b> .....                              | <b>7</b>  |
| 54 | <b>2.4 Study flow-chart</b> .....                           | <b>8</b>  |
| 55 | <b>2.5 Sample size justification</b> .....                  | <b>8</b>  |
| 56 | <b>2.6 Planning / history of study analyses</b> .....       | <b>9</b>  |
| 57 | <b>3 STUDY POPULATION</b> .....                             | <b>10</b> |
| 58 | <b>3.1 Intent-to-treat population (ITT)</b> .....           | <b>10</b> |
| 59 | <b>3.1 Modified Intent-to-treat population (mITT)</b> ..... | <b>10</b> |
| 60 | <b>3.2 Per protocol population (PP)</b> .....               | <b>10</b> |
| 61 | <b>3.3 Safety population (SP)</b> .....                     | <b>10</b> |
| 62 | <b>3.4 Quality of life population (QoL)</b> .....           | <b>10</b> |
| 63 | <b>4 STATISTICAL METHODS OVERVIEW</b> .....                 | <b>10</b> |
| 64 | <b>4.1 Softwares</b> .....                                  | <b>10</b> |
| 65 | <b>4.2 Conventions for dates</b> .....                      | <b>10</b> |
| 66 | <b>4.3 Conventions for missing data</b> .....               | <b>11</b> |
| 67 | <b>4.4 Baseline definition</b> .....                        | <b>11</b> |
| 68 | <b>5 GENERAL CONSIDERATIONS FOR DATA ANALYSES</b> .....     | <b>11</b> |
| 69 | <b>6 STATISTICAL ANALYSES</b> .....                         | <b>13</b> |
| 70 | <b>6.1 Baseline Characteristics</b> .....                   | <b>13</b> |
| 71 | 6.1.1 Patients eligibility.....                             | 13        |
| 72 | 6.1.2 Stratification Criteria .....                         | 14        |
| 73 | 6.1.3 Demographics .....                                    | 14        |
| 74 | 6.1.4 Clinical Characteristics.....                         | 14        |
| 75 | 6.1.5 Biological Characteristics.....                       | 14        |
| 76 | 6.1.6 Disease Characteristics .....                         | 15        |
| 77 | <b>6.2 Efficacy evaluation</b> .....                        | <b>15</b> |
| 78 | 6.2.1 Median follow-up time .....                           | 15        |



|    |                                                                                                             |           |
|----|-------------------------------------------------------------------------------------------------------------|-----------|
| 79 | 6.2.2 Primary efficacy criterion: Percentage of patients alive without radiological progression at 4 months |           |
| 80 | 15                                                                                                          |           |
| 81 | 6.2.3 Secondary efficacy criteria .....                                                                     | 16        |
| 82 | <b>6.3 Safety Evaluation</b> .....                                                                          | <b>19</b> |
| 83 | 6.3.1 Treatment Administration .....                                                                        | 19        |
| 84 | 6.3.2 Toxicities .....                                                                                      | 20        |
| 85 | 6.3.3 Serious Adverse Event.....                                                                            | 20        |
| 86 | <b>6.4 Other criteria evaluation</b> .....                                                                  | <b>20</b> |
| 87 | 6.4.1 Subsequent Treatments.....                                                                            | 20        |
| 88 | 6.4.2 G-CSF Administration .....                                                                            | 20        |
| 89 | 6.4.3 Quality of life (QoL) .....                                                                           | 21        |
| 90 | <b>7 VALIDATION OF ANALYSES BY A THIRD PARTY</b> .....                                                      | <b>22</b> |
| 91 |                                                                                                             |           |



92 **Abbreviations**

93

94 BMI : Body Mass Index

95 BRR : Best response rate

96 BSA : Body Surface Area

97 DCR : Disease Control Rate

98 ITT : Intent-To-Treat

99 mITT : Modified Intent-to-treat

100 OS : Overall Survival

101 PFS : Progression-free survival

102 PT : Preferred term

103 QoL : Quality of Life

104 SOC : System Organ Class

105 TTP : Time to progression

106

107



## 108 **1 Introduction**

### 109 **1.1 Study objectives**

#### 110 **1.1.1 Primary objectives**

111 The primary endpoint is the percentage of patients alive and without radiological progression (according  
112 to RECIST 1.1) at 4 months after randomization according to investigator.

113

#### 114 **1.1.2 Secondary objectives**

115 The secondary objectives are:

- 116 • Percentage of patients alive and without progression at 4 months according to centralized review
- 117 • Overall survival (OS)
- 118 • Time to strategy failure
- 119 • Safety profile
- 120 • Quality of life (QoL)
- 121 • Time to progression (TTP), the progression-free survival (median PFS), the best objective  
122 response rate (BRR) and disease control rate (DCR) according to the investigator and centralized  
123 review (according RECIST V1.1 and iRECIST criteria)
- 124 • Efficacy endpoints (OS, PFS, TTP, BRR and DCR) according to the expression PD-L1 and others  
125 biomarkers (see biological study)

#### 126 **1.1.3 Ancillary analyses**

127 Blood and tumor samples will be collected in all patients in order to allow translational research projects  
128 (Centre de Ressources Biologiques EPIGENETEC, UMR-S 1147, Paris, France, Headed by Prof. Pierre  
129 Laurent-Puig):

- 130 - Biomarkers analysis (for more details see “ancillary studies” – Appendix 2): microsatellite instability,  
131 immune response/immune score, circulating tumor DNA, tumor mutation load, gastric molecular sub-  
132 groups, expression and/or amplification of PD-L1 and PD-L2).
- 133 - Stool samples will be collected prospectively in all patients in order to allow analysis of microbiota (16S  
134 rRNA to identification of bacteria composing the intestinal microbiota of patients).

135

## 136 **2 Experimental plan**

### 137 **2.1 Study design**

138 This study is open and randomized multicenter and non-comparative study,

139

140



141 **2.2 Treatment arms**

142  
143

144 **Phase II Study**

145

146 **FOLFIRI plus durvalumab**

147 - Durvalumab: 1500 mg by 1-hour IV infusion.

148 Every 4 weeks until progression

149 - FOLFIRI (1 course every 2 weeks, until progression):

- 150 ○ Irinotecan: 180 mg/m<sup>2</sup> by 2-hour IV infusion,
- 151 ○ Folinic acid: 400 mg/m<sup>2</sup> (or 200 mg/m<sup>2</sup> if Elvorine) by 2-hours IV infusion,
- 152 ○ 5-FU bolus: 400 mg/m<sup>2</sup> by 10-minutes IV bolus,
- 153 ○ Continuous 5-FU: 2400 mg/m<sup>2</sup> by 46-hour IV infusion

154

155 **FOLFIRI plus durvalumab plus tremelimumab**

156 Induction treatment: 4 cycles (*i.e.* 1 course every 4 weeks)

- 157 - Durvalumab: 1500 mg by 1-hour IV infusion - Every 4 weeks.
- 158 - Tremelimumab: 75 mg by 1-hour IV infusion - Every 4 weeks (for only 4 cycles).
- 159 - FOLFIRI (1 course every 2 weeks, until progression):
  - 160 ○ Irinotecan: 180 mg/m<sup>2</sup> by 2-hour IV infusion
  - 161 ○ Folinic acid: 400 mg/m<sup>2</sup> (or 200 mg/m<sup>2</sup> if Elvorine) by 2-hours IV infusion
  - 162 ○ 5-FU bolus: 400 mg/m<sup>2</sup> by 10-minutes IV bolus
  - 163 ○ Continuous 5-FU: 2400 mg/m<sup>2</sup> by 46-hour IV infusion

164

165 Tremelimumab was administered for 4 courses (4 months) and then patient continue to receive FOLFIRI  
166 plus durvalumab. In case of progression on FOLFIRI plus durvalumab and disease control, tremelimumab  
167 can be re-introduced at investigator discretion.

168 Patient must have 2 weeks of washout period of first-line treatment before receiving the treatment in the  
169 trial. Treatment are repeated every 4 weeks until disease progression, unacceptable toxicity or patient's  
170 refusal.

171 All drugs (irinotecan, folinic acid and 5-FU) except durvalumab and tremelimumab are used in the context  
172 of their marketed authorization or recommendations (Thésaurus National de Cancérologie Digestive  
173 (www.tncd.org)) in France. Thus, durvalumab and tremelimumab are provided in this clinical trial. A  
174 pharmacovigilance follow-up is implemented during the study.

175

176 **2.3 Randomization**

177 The randomization procedure was performed for the Phase II study.

178

179 The randomization was done using minimization technique according to the ratio 1:1 and the following  
 180 factors are considered for the stratification:

- 181 - Center
- 182 - Duration of disease control to previous first-line chemotherapy (no disease control vs < 3 months  
 183 vs ≥ 3 months)

184  
 185

## 186 2.4 Study flow-chart

187 For the phase II study:

188

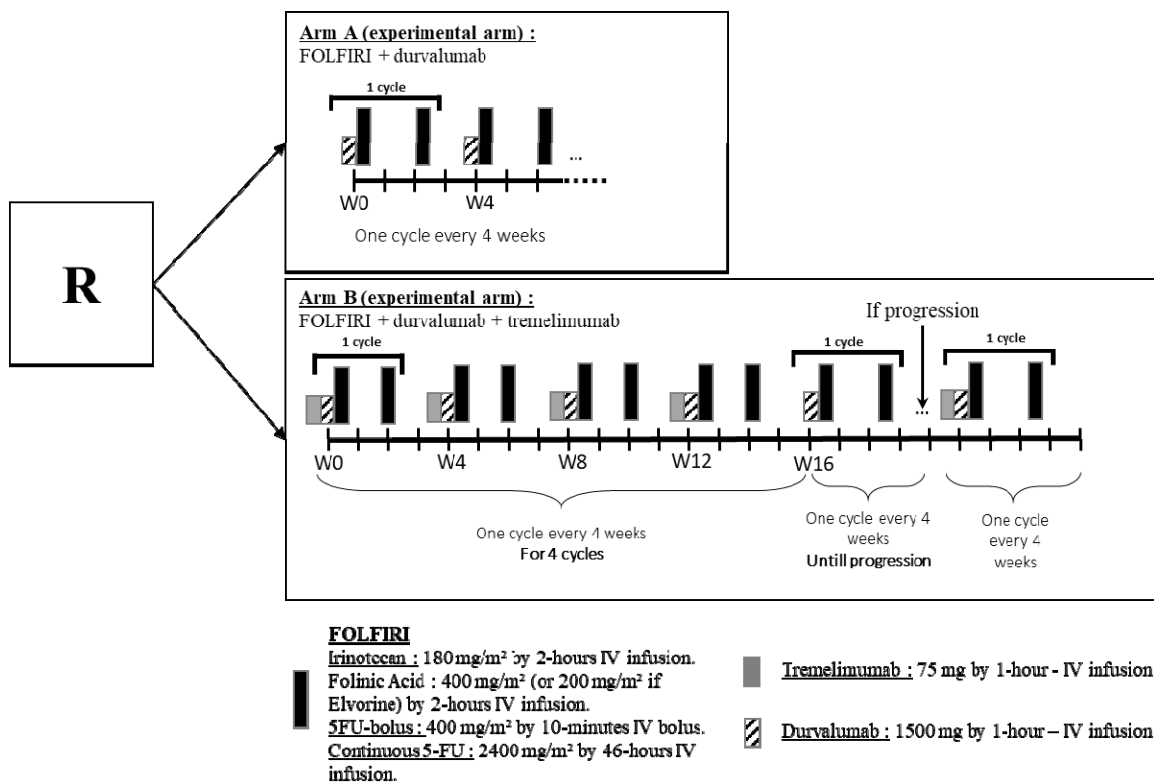

189  
 190  
 191

## 192 2.5 Sample size justification

193 Median PFS with FOLFIRI as second-line chemotherapy in gastric and GEJ adenocarcinoma is between 2 to  
 194 4 months. We expected at least 5 months median PFS difference with FOLFIRI + durvalumab ±  
 195 tremelimumab which is clinically significant.

196

197 The hypotheses for the randomized phase II were:

198 H<sub>0</sub>: 50% of patients alive and without progression at 4 months is not acceptable.

199 H<sub>1</sub>: 70% of patients alive and without progression at 4 months is expected.





200 With a risk  $\alpha$  (one-sided) of 5%, a power of 85% and according to the binomial exact method (A'Hern), 44  
201 evaluable patients (i.e. patients randomized and with at least one dose of products taken) were needed by  
202 arm. Assuming 5% of non-evaluable or lost to follow-up patients, **47 patients were to be included by**  
203 **arm (94 patients in total).**

204 **Taking into account the 11 patients included in the safety run-in phase, 105 patients were be**  
205 **included in the trial.**

206

207 **Rules for selection to be applied to both experimental arms (on the 44 evaluable patients):**

208 

- if 28 or more patients are alive without progression at 4 months then the arm will be considered

209 as efficient.

210

211 In case both arms will conclude to efficacy, safety data will be analyzed (both Adverse events and Serious  
212 Adverse events) in order to see if one has a better safety profile. One or both arms could be compared to a  
213 control arm (FOLFIRI) in a phase III study.

214

## 215 **2.6 Planning / history of study analyses**

216 For safety run-in phases, patients were treated in 5 expert centers with a huge experience in the use of  
217 immune checkpoints inhibitors.

218

219 **1<sup>st</sup> step:** In order to check the good tolerability of FOLFIRI plus durvalumab combination, 5 patients were  
220 treated by FOLFIRI (irinotecan 180mg/m<sup>2</sup>) plus durvalumab (1500 mg) in 5 expert centers. The inclusion  
221 was stopped at 5 patients. When the 5th patient received 2 cycles of treatment, the safety analysis was  
222 done with all the safety data available at this date. The review was done by an Independent Data  
223 Monitoring Committee (IDMC) on 07 January 2020.

224

225 The decision of IDMC and the data available were sent to ANSM. ANSM approved to re-open the inclusion  
226 of patients.

227

228 **2<sup>nd</sup> step:** 3 patients per arm were randomized to receive either FOLFIRI (irinotecan 180 mg/m<sup>2</sup>) plus  
229 durvalumab (1500 mg) or FOLFIRI (irinotecan 150 mg/m<sup>2</sup>) plus durvalumab (1500 mg) plus  
230 tremelimumab (75 mg). These 6 patients were treated in the same 5 expert centers. When the 6<sup>th</sup> patient  
231 received 2 cycles of treatment, the safety analysis was done with all the safety data available at this date  
232 (for the 11 patients included in these safety run-in phases). The review was done by an Independent Data  
233 Monitoring Committee (IDMC) on the 21 July 2020.

234 The decision of IDMC and the data available were sent to ANSM. ANSM approved to open the phase II trial.

235

236 There was no statistical hypothesis for the safety run-in phase. A total of 11 patients were included in the  
237 2 steps of the safety run-in phase before the randomized phase II study began.

238



## 239 **3 Study population**

### 240 **3.1 Intent-to-treat population (ITT)**

241 The intention-to-treat (ITT) population is defined as all patients included in the phase II whatever the  
242 eligibility criteria are and the treatment received. Patients will be analyzed according to the allocated  
243 group by randomisation, even if they receive a different treatment.

244

### 245 **3.1 Modified Intent-to-treat population (mITT)**

246 The modified intention-to-treat (mITT) population is defined as all patients whatever the eligibility  
247 criteria and who received at least one dose of treatment in the study. Patients will be analyzed according  
248 to randomized treatment.

249

### 250 **3.2 Per protocol population (PP)**

251

252 The per protocol population (PP) is defined as all patients with no major deviation on the eligibility  
253 criteria, who received at least two doses of treatment in the study and a survival superior to 3 months.  
254 Patients will be analyzed according to randomized treatment.

255

### 256 **3.3 Safety population (SP)**

257 The safety population (SP) is defined as all patients who have had received at least one dose of treatment  
258 in the study. Patients will be analyzed according to treatment received.

259

### 260 **3.4 Quality of life population (QoL)**

261 The Quality of life (QoL) population is defined as all mITT patients with a baseline questionnaire and at  
262 least one questionnaire during follow-up. Patients will be analyzed according to the received arm.

263

## 264 **4 Statistical methods overview**

### 265 **4.1 Softwares**

266 Statistical analyses will be done with SAS (Statistical Analysis System, SAS Institute, North Carolina, USA).  
267 version 9.4.

268

### 269 **4.2 Conventions for dates**

270 Randomization/Inclusion date will be considered as Day 1. The previous day is defined as Study day -1  
271 (no Study day 0 is defined).

272 Duration will be calculated according the following rule:



273 As an example, time between death and randomization: Date of death - Date of randomization + 1. Date of  
274 last news will be the later date between date of clinical exam, date of last treatment administered or date of  
275 last contact.

276 Rules for conversion in month or later will be the usual ones:

- 277 - 1 month = 30.4375 days
- 278 - 1 year = 365.25 days

279

### 280 **4.3 Conventions for missing data**

281 Except for specific cases, missing data will not be replaced.

282 The following conventions will be used for completing dates:

283 For the start dates:

- 284 - if the day is missing (UK/01/2012), the day "01" will be used (01/01/2012)
- 285 - if the month is missing (UK/UK/2012), the month "01" will be used (01/01/2012).

286 For the end dates:

- 287 - if the day is missing (UK/01/2012), the day "30" will be used (30/01/2012 – warning: be careful  
288 for February)
- 289 - if the month is missing (UK/UK/2012), the month "12" will be used (30/12/2012).

290 For other dates:

- 291 - if the day is missing (UK/01/2012), the 15 of the month will be used (15/01/2012)
- 292 - if the month is missing (UK/UK/2012), the month "06" will be used (15/06/2012).

293

### 294 **4.4 Baseline definition**

295 Baseline measures will be the last measure done before the inclusion/randomization. In case of missing  
296 data, the last measure could also be the last measure before the first treatment intake.

297

## 298 **5 General considerations for data analyses**

299 The **quantitative** variables will be described by the usual statistics: n, mean, standard deviation, median,  
300 interquartile range, minimum and maximum. They can also be categorized according to cut-offs of the  
301 medical literature.

302 The **qualitative** variables will be described using number and percentages. The missing values will not be  
303 counted for the percentage calculation.

304

305 The **time to event endpoint** will be estimated and plotted using the Kaplan-Meier estimator (Kaplan and  
306 Meier, 1958). Number of events will be described according treatment arms. Survival curves and also % at  
307 different time-points (and their 95%CI) will be also estimated. The median time and the rates at different  
308 times will be described with their 95% confidence interval. The standard error will be estimated by the  
309 Greenwood formula and the log-log transformation will be used to compute confidence intervals.

310

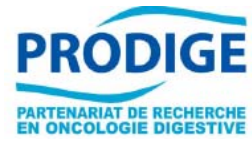

311 Median follow-up time will be calculated using the reverse Kaplan-Meier method (Schemper et Smith,  
312 1996)<sup>1</sup>.

313

314 **Excepted particular cases, for example baseline characteristics, results will be described by**  
315 **treatment arms.**

316

---

<sup>1</sup> Schemper, M., & Smith, T. L. (1996). A note on quantifying follow-up in studies of failure time. *Controlled clinical trials*, 17(4), 343-346.

317

## 318 6 Statistical Analyses

319

|                                                                                                        | ITT | mITT | SP | PP | QoL |
|--------------------------------------------------------------------------------------------------------|-----|------|----|----|-----|
| Eligibility                                                                                            | X   |      |    |    |     |
| Baseline characteristics                                                                               |     | X    |    | X  |     |
| <b>Primary criterion</b>                                                                               |     |      |    |    |     |
| Percentage of patients alive without progression (RECIST V1.1) at 4 months                             |     | X    |    | X  |     |
| <b>Secondary criteria</b>                                                                              |     |      |    |    |     |
| Time to progression (RECIST V1.1)                                                                      |     | X    |    | X  |     |
| Progression-free survival (median PFS) RECIST V1.1                                                     |     | X    |    | X  |     |
| Objective Response rate (RECIST V1.1)                                                                  |     | X    |    | X  |     |
| Disease control rate (RECIST V1.1)                                                                     |     | X    |    | X  |     |
| Time to progression (according iRECIST criteria)                                                       |     |      |    |    |     |
| Progression-free survival (median PFS) according to iRECIST V1.1                                       |     |      |    |    |     |
| Objective Response rate ( iRECIST criteria)                                                            |     |      |    |    |     |
| Disease control rate (iRECIST V1.1)                                                                    |     |      |    |    |     |
| Time to strategy failure                                                                               |     | X    |    |    |     |
| Overall survival                                                                                       |     | X    |    | X  |     |
| Toxicities                                                                                             |     |      | X  |    |     |
| Treatment intake                                                                                       |     |      | X  |    |     |
| Quality of life QLQ-C30                                                                                |     |      |    |    | X   |
| <b>Central review</b>                                                                                  |     |      |    |    |     |
| Time to progression RECIST V1.1                                                                        |     | X    |    |    |     |
| Time to progression iRECIST                                                                            |     | X    |    |    |     |
| Progression-free survival RECIST V1.1                                                                  |     | X    |    |    |     |
| Progression-free survival iRECIST                                                                      |     | X    |    |    |     |
| Best objective response rate RECIST V1.1                                                               |     | X    |    |    |     |
| Best objective response rate iRECIST                                                                   |     | X    |    |    |     |
| Disease control rate RECIST V1.1                                                                       |     | X    |    |    |     |
| Disease control rate iRECIST                                                                           |     | X    |    |    |     |
| <b>Ancillary analyses</b>                                                                              |     |      |    |    |     |
| Efficacy endpoints (OS, PFS, TTP, BRR and DCR) according to the expression PD-L1 and others biomarkers |     | X    |    |    |     |

320

321

322

### 6.1 Baseline Characteristics

323

324 Baseline characteristics (except eligibility done on ITT population) will be described by treatment arms  
325 and on the overall population in mITT and PP population.

326

327

#### 6.1.1 Patients eligibility

328

- the number of patients who all inclusion criteria are respected,



- 329
- the number of patients who all non-inclusion criteria are respected,
- 330
- the number of patients who all eligibility criteria (i.e inclusion and non-inclusion) are respected,
- 331
- patient data listing of protocol deviations,
- 332
- the number of patients per population will be described (reason for non-inclusion will be
- 333
- described)
- 334

### 335 **6.1.2 Stratification Criteria**

336 Stratification factors will be described (from the randomization form) according to treatment arms to  
337 ensure the correct balancing of factors (on ITT population). No statistical tests will be done.

338 Durée de contrôle de la maladie avec la chimiothérapie de 1<sup>ère</sup> ligne (pas de contrôle vs contrôle de la  
339 maladie < 3 mois vs contrôle de la maladie  $\geq$  3 mois).

340

### 341 **6.1.3 Demographics**

- 342 - Center
- 343 - Age (year)
- 344 - Gender (Male vs Female)
- 345

346

### 347 **6.1.4 Clinical Characteristics**

- 347 - ECOG at baseline
- 348 - BMI (Kg/m<sup>2</sup>)

349

### 349 **6.1.5 Biological Characteristics**

- 350 - Haemoglobin (g/dL)
- 351 - Platelets (10<sup>3</sup>/mm<sup>3</sup>)
- 352 - PNN (/mm<sup>3</sup>)
- 353 - Leucocytes (/mm<sup>3</sup>)
- 354 - Lymphocytes (/mm<sup>3</sup>)
- 355 - Total bilirubin ( $\mu$ mol/L)
- 356 - Creatinine clairance (mL/Min)
- 357 - ASAT (UI/L)
- 358 - ALAT (UI/L)
- 359 - GGT (UI/L)
- 360 - PAL (UI/L)
- 361 - LDH (UI/L)
- 362 - Albumin (g/L)
- 363 - Pre-Albumin (g/L)
- 364 - CRP (mg/L)
- 365 - Uracilémie
- 366



367

### 6.1.6 Disease Characteristics

- 368 - Delay between primary tumor diagnosis and inclusion (months)
- 369 - HER2 status
- 370 - Type of tumor
- 371 - MSI status
- 372 - Method used to determine MSI status
- 373 - Location of the primary tumor
- 374 - Primary tumor resection (Delay between resection and inclusion, margin quality)
- 375 - Type of disease
- 376 - Localisation of metastases (if applicable), resection, localisation of resected metastases and
- 377 margin quality
- 378 - Previous Treatment :
  - 379 ○ Neo-adjuvant treatment with schema description
  - 380 ○ Adjuvant treatment with schema description
  - 381 ○ 1st line treatment with schema description and reason of stop

382

## 383 6.2 Efficacy evaluation

384 Efficacy analyses will be done on the mITT and PP population. Statistics will be presented by treatment  
385 arms.

386

### 387 6.2.1 Median follow-up time

388 Median follow-up is defined as the time between date of randomization and the last news date (Alive or  
389 lost-to-follow-up patients) or death (whatever the cause is). The median follow-up time and its 95%CI will  
390 be calculated in months by reverse Kaplan-Meier method. It will be described by treatment arms and on  
391 the whole population.

392

### 393 6.2.2 Primary efficacy criterion: Percentage of patients alive without 394 radiological progression at 4 months

395

#### 396 6.2.2.1 Definition

397

398 The primary endpoint is the percentage of patients alive and without radiological progression (according  
399 to RECIST 1.1) at 4 months after randomization according to investigator.

400 Progression will be assessed by the investigator according to RECIST 1.1 criteria on the basis of imagery  
401 performed every 8 weeks, Imagery done until <4.5 months will be considered for the evaluation of the  
402 progression.

403

404 Patients with progression on imageries prior to 4.5 months will be considered as progressing at 4 months.



405 Patients without progression on imageries prior to 4 months will be reviewed in case of a scan between 4  
406 and 4.5 to determine if progressive at 4 months.

407

408 A medical review will be performed to decide on the case of patient lost to follow-up or not evaluable at 4  
409 months without progression identified before 4 months; based on the patient's complete file, the patient  
410 may be considered as a treatment failure (progression), or as really not evaluable and not participating in  
411 the analysis of the primary endpoint.

412

#### 413 **6.2.2.2 Evaluation**

414

415 The rules for selection to be applied to both experimental arms (on the 44 evaluable patients):

- 416 • if 28 or more patients are alive without progression at 4 months then the arm will be considered  
417 as efficient.

418 The percentage of patients alive and without progression at 4 months will be described with its two-sided  
419 90% confidence interval.

420

### 421 **6.2.3 Secondary efficacy criteria**

#### 422 **6.2.3.1 Progression free survival (PFS)**

##### 423 **6.2.3.1.1 Definition**

424 Progression free survival (PFS) is defined as the time between date of randomization and date of the first  
425 radiological progression (according to RECIST 1.1) or death (from any cause), whichever occurs first.  
426 Patients alive without progression will be censored at date of last news.

427

##### 428 **6.2.3.1 Evaluation**

429 The time scale considered is the month.

430 Progression-free survival will be plotted using the Kaplan Meier estimator and the rates will be given at  
431 different time points along with their 95% confidence intervals as well as the median.

432

#### 433 **6.2.3.2 Overall Survival (OS)**

##### 434 **6.2.3.2.1 Definition**

435 Overall Survival (OS) is defined as the time between date of randomization and date of death (from any  
436 cause). Patients alive will be censored at date of last news.

##### 437 **6.2.3.2.2 Evaluation**

438 The time scale considered is the month.

439 Overall survival will be plotted using the Kaplan Meier estimator and the rates will be given at different  
440 time points along with their 95% confidence intervals as well as the median.





441

### 442 **6.2.3.3 Time to progression (TTP)**

#### 443 **6.2.3.3.1 Definition**

444 Time to progression (TTP) is defined as the time between date of randomization and the date of first  
445 radiological progression (according to RECIST v1.1) or death linked to cancer. Patients without  
446 progression will be censored at date of last news or date of death. The death not linked to cancer will not  
447 be considered as an event.

448

#### 449 **6.2.3.3.2 Evaluation**

450 The time scale considered is the month.

451 Time to progression will be plotted using the Kaplan Meier estimator and the rates will be given at  
452 different time points along with their 95% confidence intervals as well as the median.

453

### 454 **6.2.3.4 Best Objective Response rate (BRR):**

#### 455 **6.2.3.4.1 Definition**

456 Best Objective Response rate (BRR) is defined as complete or partial response at the best response  
457 evaluation during the treatment according to RECIST v1.1.

458 Imageries collected during the protocol treatment period (one month after last cycle or definitive end of  
459 treatment) and before the beginning of a subsequent treatments will be considered.

460 Waterfall plots will be done to measure the quality of the best response.

461 For complete response and partial response the duration of the response will be calculated taking into  
462 account the next progression or death after the objective response

463

#### 464 **6.2.3.5 Evaluation**

465 Percentages will be described with the usual statistics by treatment arms.

466

### 467 **6.2.3.6 Disease control rate (DCR)**

#### 468 **6.2.3.6.1 Definition**

469 Disease control rate (DCR) is defined as complete or partial response or stable disease at the best  
470 response evaluation according to RECIST v1.1.

#### 471 **6.2.3.6.2 Evaluation**

472 Percentages will be described with the usual statistics by treatment arms.

473



474 **6.2.3.7 Time to strategy failure**

475 **6.2.3.7.1 Definition**

476 Time to strategy failure is defined as the time between randomization date and date of death (from any  
477 cause) or the date of first radiological progression (RECIST V1.1) in the FOLFIRI + durvalumab arm or  
478 date of the second radiological progression after re-introduction of tremelimumab in the  
479 FOLFIRI/durvalumab/tremelimumab arm or date of definitive discontinuation.

480 In case a treatment is stopped for toxicity reason but re-introduced later for progression, then this  
481 progression will not be considered for this endpoint.

482 **6.2.3.7.2 Evaluation**

483 Time to strategy failure will be described with the usual statistics by treatment arms.  
484

485 **6.2.3.8 Central review**

486 **6.2.3.8.1 Progression-free Survival (PFS)**

487 For RECIST v1.1 evaluation, same definition as §6.2.3.1.

488 A secondary analysis will be done in iRECIST for both arms. The progression to be taken into account is  
489 the first Progression confirmed (iCPD).

490 **6.2.3.8.2 Time to progression (TTP)**

491 For RECIST v1.1 evaluation, same definition as § 6.2.3.3.

492 Secondary analysis will be done in iRECIST for both arms. The progression to be taken into account is the  
493 first Progression confirmed (iCPD).

494 **6.2.3.8.3 Best objective response (BRR)**

495 For RECIST v1.1 evaluation, same definition as § 6.2.3.4

496 Secondary analysis will be done in iRECIST for both arms.  
497

498 **6.2.3.8.4 Disease control duration**

499 For RECIST v1.1 evaluation, same definition as § 6.2.3.5

500 Secondary analysis will be done in iRECIST for both arms.  
501

502 **6.2.3.8.5 Ancillary analyses**

503 Centralized radiological assessments of RECIST v1.1 response and iRECIST response according Seymour  
504 *et al.* criteria. For exploration, secondary endpoints (OS, PFS, TTP, BRR and DCR) will be analysed  
505 according to this centralized review.  
506



## 507 **6.3 Safety Evaluation**

508

509 All safety analyses will be done on SP population and presented by treatment arms.

510

### 511 **6.3.1 Treatment Administration**

#### 512 **6.3.1.1 Treatment duration**

513 Treatment duration will be calculated as follow:

514 Last treatment administration (D15 or D1) - D1 of the first treatment administration + 1

515 This duration will be evaluated in month. Free-chemotherapy intervals and number of days for cycles  
516 delayed will not be subtracted of this time.

517 In case of free-chemotherapy interval, if the protocol is not re-introduced then the date of end of  
518 treatment could be the date of a subsequent line.

519 It will be described using usual descriptive statistics by treatment arms.

520

#### 521 **6.3.1.2 Doses administered**

522 The following will be described by treatment arm:

- 523 - the number of patients with at least one dose of treatment,
- 524 - the number of cures performed overall and by products

525 It will be interesting to see if patients stopped Irinotecan and continue under 5FU+immunotherapy or  
526 only on immunotherapy.

527

528 In case of the body surface area (BSA) is not indicated in the CRF it will be calculated using the following  
529 formula (Gehan and Georges):

$$530 \quad 0.0235 \times \text{height(cm)}^{0.42246} \times \text{weight(kg)}^{0.51456}$$

531 The weight is the weight x indicated by the investigator to the cure x

532 If weight is missing, the previous weight indicated will be used.

533 The dose received and the percentages of actual dose received over theoretical dose will be described by  
534 patient and summarized by treatment.

535 Theoretical doses depend of the treatment taken:

- 536 • 5FU bolus : 400 mg/m<sup>2</sup>
- 537 • 5FU continuous : 2400 mg/m<sup>2</sup>
- 538 • Irinotecan : 180 mg/m<sup>2</sup>
- 539 • Durvalumab : 1500 mg
- 540 • Tremelimumab: 75 mg

541

#### 542 **6.3.1.3 Dose modifications and administration postponement**

543 The following will be summarized by treatment arm:

- 544 • Number and percentage of patients presenting at least one dose modification



545 • Number and percentage of patients presenting at least one administration postponement

546 • Reasons for modifications/postponement will be tabulated

547

#### 548 **6.3.1.4 Definitive treatment stop**

549 The number and the percentage of patients with a definitive stop of treatment as well as the reason of  
550 definitive stop (% over the number of patients with a definitive stop) will be described by treatment arm.

551

#### 552 **6.3.2 Toxicities**

553 Toxicities (graded according NCI-CTC v 4.0) will be described by treatment arms and regarding the  
554 treatment causality (Linked/doubtful versus not linked) with:

555 • Number and percentage of patients presenting at least one maximal grade 3-4 toxicities and those  
556 presenting at least one maximal grade 1-2, over the whole treatment period.

557 • Number and percentage of patients presenting at least one maximal grade 3-4 toxicities and those  
558 presenting at least one maximal grade 1-2, over the whole treatment period, by types of toxicities  
559 (SOC: System Organ Class) and preferred term (PT).

560

561 A listing of grade 5 toxicities will be also provided.

562

563 A listing will done to describe the persisting toxicities.

564

#### 565 **6.3.3 Serious Adverse Event**

566 Summary of SAEs will be provided by the PV department.

567

### 568 **6.4 Other criteria evaluation**

569

#### 570 **6.4.1 Subsequent Treatments**

571 Analysis will be done on SP population.

572

573 Subsequent treatments will be described by treatment arms according the line of treatments (if more than  
574 one).

#### 575 **6.4.2 G-CSF Administration**

576 Analysis will be done on SP population.

577

578 The number of patients who took G-CSF will be described as well as the type of prophylaxis and the type  
579 of treatment by treatment arms.

580

581



582

### 6.4.3 Quality of life (QoL)

583

584 Quality of life (QoL) will be evaluated using EORTC QLQ-C30 and the STO22 questionnaires and will be  
585 done on the QOL population.

586

587

#### 6.4.3.1 QLQ-C30 questionnaire

588 The QLQ-C30 is a cancer-specific tool composed of 30 items. Five functional scores (physical, role,  
589 cognitive, social, and emotional), a global health score ranging from 0 (worst) to 100 (best) have been  
590 developed as well as 9 symptom scores (nausea, pain, fatigue, dyspnoea, difficulty sleeping, anorexia,  
591 constipation, diarrhea and perceived financial difficulties) ranging from 0(best) to 100 (worse).

592 Scores will be calculated in agreement with the scoring EORTC manual.

593 The scores of EORTC QLQ-C30 will be described at baseline (last questionnaire before the start of  
594 treatment ie date of questionnaire  $\leq$  date of first treatment administration), by treatment arm on the QoL  
595 population.

596

597 Number and percentage of patients with at least one questionnaire at baseline and during the study will  
598 be described by treatment arms.

599

#### 600 6.4.3.1.1 Survival without QoL deterioration

##### 601 6.4.3.1.1.1 Definition

602 Survival without QoL deterioration is defined as the time interval between randomization and the  
603 occurrence of a definitive deterioration  $\geq$  5 points or death based on the global health score.

604 A definitive deterioration  $\geq$  5 points is defined as a decrease in QLQ-C30 QL2 score  $\geq$  5 points (compared  
605 to the QoL score at inclusion) without any further improvement in QoL score  $\geq$  5 points or any further  
606 available QoL data.

607 Patients alive without definitive deterioration will be censored at the last follow-up.

608

##### 609 6.4.3.1.1.2 Evaluation

610 Months will be considered as time scale.

611 Survival without QoL deterioration will be analyzed using the Kaplan Meier method on QoL population.

612 The description will be made by treatment arm using the median, and the rates will be estimated at  
613 different stages of evaluation (95% confidence intervals will also be provided).

614

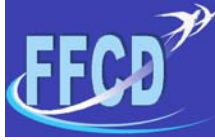

615 **6.4.3.1 STO-22 questionnaire**

616 The STO-22 questionnaire is composed of 22 items. Nine scores are calculated: one functional ability score  
617 (body image) and eight symptom scores (dysphagia, pain, reflux symptoms, food restrictions, anxiety, dry  
618 mouth, taste, hair loss).

619

620 Number and percentage of patients with at least one questionnaire will be described for baseline, on study  
621 and both baseline and on-study.

622

623 Scores will be described by treatment for patients having both a baseline and at least one questionnaire  
624 on-study with:

- 625 - Baseline evaluation of the score
- 626 - Last evaluation on treatment of the score
- 627 - Difference between both score

628

629 Evaluation across time for each score could also be done in case of sufficient number of questionnaires.

630

631 **7 Validation of analyses by a third party**

632

633 The primary endpoint will be analyzed by another statistician (PFS evaluated by investigators according  
634 to RECIST 1.1 in mITT population) to consolidate the conclusion of the study.
