# Supplementary material for: FOLFIRI Plus Durvalumab With or Without Tremelimumab in Second-Line Treatment of Advanced Gastric or Gastroesophageal Junction Adenocarcinoma: The PRODIGE 59-FFCD 1707-DURIGAST Randomized Clinical Trial
Source: PubMed Central journal article supplement (PMC11190792; doi:10.1001/jamaoncol.2024.0207), 2024-04-04
Supplement: jamaoncol-e240207-s003.pdf [file jamaoncol-e240207-s003.pdf]

Tougeron D, Dahan L, Evesque L, et al. FOLFIRI Plus Durvalumab With or Without Tremelimumab in Second-Line Treatment of Advanced Gastric or Gastroesophageal Junction Adenocarcinoma: The PRODIGE 59-FFCD 1707-DURIGAST Randomized Clinical Trial. JAMA Oncol. Published online April 4, 2024. doi:10.1001/jamaoncol.2024.0207

| *First Name and Middle Initial(s) | *Last Name       | *Suffix (eg, Jr, III) | Academic Degrees | Institution                                                  | Location (city, state/province, country) | Role or Contribution, eg, chair, principal investigator | Group (if more than 1 Group listed in the byline) and/or Subgroup (eg, Steering Committee) |
|-----------------------------------|------------------|-----------------------|------------------|--------------------------------------------------------------|------------------------------------------|---------------------------------------------------------|--------------------------------------------------------------------------------------------|
| Vincent                           | HAUTEFEUILLE     |                       | DR               | CHU HÔPITAL SUD                                              | AMIENS (FRANCE)                          | Investigator                                            |                                                                                            |
| Anne                              | THIROT-BIDAULT   |                       | DR               | HOPITAL PRIVÉ HOPITAL PRIVE                                  | ANTONY (FRANCE)                          | Investigator                                            |                                                                                            |
| Rania                             | BOUSTANY-GRENIER |                       | DR               | CLINIQUE PRIVÉE INSTITUT DU CANCER AVIGNON PROVENCE          | AVIGNON (FRANCE)                         | Investigator                                            |                                                                                            |
| Marjorie                          | FAURE            |                       | DR               | CLINIQUE PRIVÉE BELHARRA                                     | BAYONNE (FRANCE)                         | Investigator                                            |                                                                                            |
| Christophe                        | DEBELLEIX        |                       | DR               | CLINIQUE PRIVÉE TIVOLI                                       | BORDEAUX (FRANCE)                        | Investigator                                            |                                                                                            |
| David                             | TAVAN            |                       | DR               | CLINIQUE PRIVÉE INFIRMERIE PROTESTANTE                       | CALUIRE ET CUIRE (FRANCE)                | Investigator                                            |                                                                                            |
| Amr                               | EL WESHI         |                       | DR               | CH CHP DU COTENTIN                                           | CHERBOURG-EN-COTENTIN (FRANCE)           | Investigator                                            |                                                                                            |
| You-Heng                          | LAM              |                       | DR               | CH                                                           | CHOLET (FRANCE)                          | Investigator                                            |                                                                                            |
| Denis                             | PEZET            |                       | PR               | CHU ESTAING                                                  | CLERMONT FERRAND (FRANCE)                | Investigator                                            |                                                                                            |
| Marion                            | BOLLIET          |                       | DR               | CH HOPITAUX CIVILS DE COLMAR                                 | COLMAR (FRANCE)                          | Investigator                                            |                                                                                            |
| Ariane                            | DARUT-JOUVE      |                       | DR               | CLINIQUE PRIVÉE INSTITUT DE CANCÉROLOGIE DE BOURGOGNE GRRECC | DIJON (FRANCE)                           | Investigator                                            |                                                                                            |
| Jean-François                     | PAITEL           |                       | DR               | CH FREJUS ST RAPHAEL                                         | FREJUS (FRANCE)                          | Investigator                                            |                                                                                            |
| Aurélien                          | CARNOT           |                       | DR               | CAC OSCAR LAMBRET                                            | LILLE (FRANCE)                           | Investigator                                            |                                                                                            |
| Diane                             | PANNIER          |                       | DR               | CAC OSCAR LAMBRET                                            | LILLE (FRANCE)                           | Investigator                                            |                                                                                            |
| Valérie                           | LE BRUN LY       |                       | DR               | CHU DUPUYTREN                                                | LIMOGES (FRANCE)                         | Investigator                                            |                                                                                            |
| Jérôme                            | DESRAME          |                       | PR               | CLINIQUE PRIVÉE JEAN MERMOZ                                  | LYON (FRANCE)                            | Investigator                                            |                                                                                            |
| Julie                             | GIGOUT           |                       | DR               | HOPITAL PRIVÉ HOPITAL EUROPEEN MARSEILLE                     | MARSEILLE (FRANCE)                       | Investigator                                            |                                                                                            |
| Philippe                          | DOMINICI         |                       | DR               | HOPITAL PRIVÉ HOPITAL EUROPEEN MARSEILLE                     | MARSEILLE (FRANCE)                       | Investigator                                            |                                                                                            |

| *First Name and Middle Initial(s) | *Last Name           | *Suffix (eg, Jr, III) | Academic Degrees | Institution                                                    | Location (city, state/province, country) | Role or Contribution, eg, chair, principal investigator | Group (if more than 1 Group listed in the byline) and/or Subgroup (eg, Steering Committee) |
|-----------------------------------|----------------------|-----------------------|------------------|----------------------------------------------------------------|------------------------------------------|---------------------------------------------------------|--------------------------------------------------------------------------------------------|
| Muriel                            | DULUC                |                       | DR               | CHU AP-HM LA TIMONE                                            | MARSEILLE (FRANCE)                       | Investigator                                            |                                                                                            |
| Emmanuelle                        | NORGUET<br>MONNEREAU |                       | DR               | CHU AP-HM LA TIMONE                                            | MARSEILLE (FRANCE)                       | Investigator                                            |                                                                                            |
| Christophe                        | LOCHER               |                       | DR               | CH GHI DE L'EST FRANCILIEN SITE DE MEAUX                       | MEAUX (FRANCE)                           | Investigator                                            |                                                                                            |
| Morgan                            | ANDRE                |                       | DR               | CH LAYNÉ                                                       | MONT DE MARSAN (FRANCE)                  | Investigator                                            |                                                                                            |
| Eric                              | FRANCOIS             |                       | DR               | CAC ANTOINE LACASSAGNE                                         | NICE (FRANCE)                            | Investigator                                            |                                                                                            |
| Romain                            | COHEN                |                       | DR               | CHU AP-HP SAINT ANTOINE                                        | PARIS (FRANCE)                           | Investigator                                            |                                                                                            |
| Olivier                           | DUBREUIL             |                       | DR               | HOPITAL PRIVÉ GROUPE HOSPITALIER DIACONESSES CROIX SAINT SIMON | PARIS (FRANCE)                           | Investigator                                            |                                                                                            |
| Mostefa                           | BENNAMOUN            |                       | DR               | HOPITAL PRIVÉ MONTSOURIS                                       | PARIS (FRANCE)                           | Investigator                                            |                                                                                            |
| Christophe                        | LOUVET               |                       | PR               | HOPITAL PRIVÉ MONTSOURIS                                       | PARIS (FRANCE)                           | Investigator                                            |                                                                                            |
| Emilie                            | SOULARUE             |                       | DR               | HOPITAL PRIVÉ MONTSOURIS                                       | PARIS (FRANCE)                           | Investigator                                            |                                                                                            |
| Eric                              | TERREBONNE           |                       | DR               | CHU HAUT LÉVÊQUE                                               | PESSAC (FRANCE)                          | Investigator                                            |                                                                                            |
| Rayan                             | ELFADEL              |                       | DR               | CHU LA MILETRIE                                                | POITIERS (FRANCE)                        | Investigator                                            |                                                                                            |
| Aurélie                           | FERRU                |                       | DR               | CHU LA MILETRIE                                                | POITIERS (FRANCE)                        | Investigator                                            |                                                                                            |
| Damien                            | BOTSEN               |                       | DR               | CHU ROBERT DEBRÉ                                               | REIMS (FRANCE)                           | Investigator                                            |                                                                                            |
| Romain                            | DESGRIPPES           |                       | DR               | CH                                                             | SAINT MALO (FRANCE)                      | Investigator                                            |                                                                                            |
| Thierry                           | MURON                |                       | DR               | CHU INSTITUT CANCEROLOGIQUE LUCIEN NEUWIRTH                    | SAINT PRIEST EN JAREZ (FRANCE)           | Investigator                                            |                                                                                            |
| Asmahane                          | BENMAZIANE-TEILLET   |                       | DR               | CH FOCH                                                        | SURESNES (FRANCE)                        | Investigator                                            |                                                                                            |
| Thierry                           | LECOMTE              |                       | PR               | CHU TROUSSEAU                                                  | TOURS (FRANCE)                           | Investigator                                            |                                                                                            |
